# Supplementary material for: Expediting clinician assessment in the diagnosis of autism spectrum disorder
Source: PubMed Central journal article supplement (PMC7540056; doi:10.1111/dmcn.14530), 2020-04-02
Supplement: DMCN-62-806-s001.pdf [file DMCN-62-806-s001.pdf]

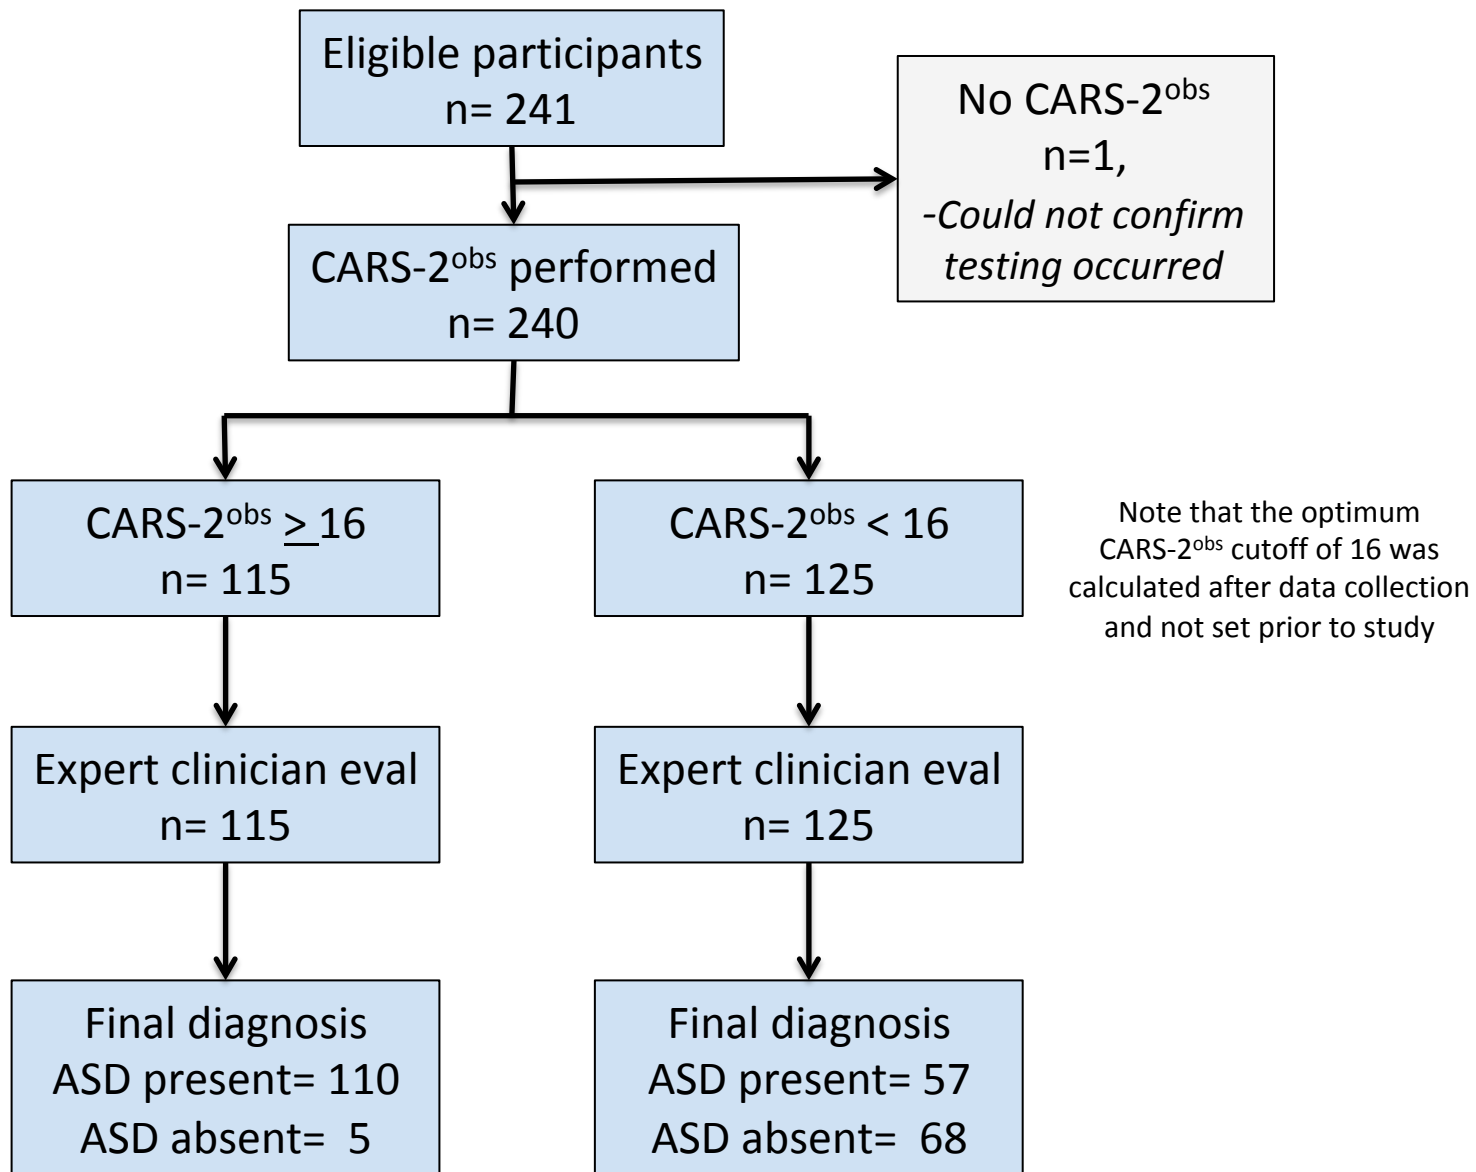

Figure S1. Diagram illustrating flow of participants through study.
