# Supplementary material for: Expediting clinician assessment in the diagnosis of autism spectrum disorder
Source: PubMed Central journal article supplement (PMC7540056; doi:10.1111/dmcn.14530), 2020-04-02

Figure S2. CARS-2 item 10-14 score distributions between ASD patients and non-ASD patients (ASD ruled out). The competing diagnoses that each item helps to assess for are listed below. Item 10: Anxiety, Items 11 and 12: Language delay, Item 13: ADHD, Item 14: Intellectual disability.

CARS-2 Item 10 (p=0.053)

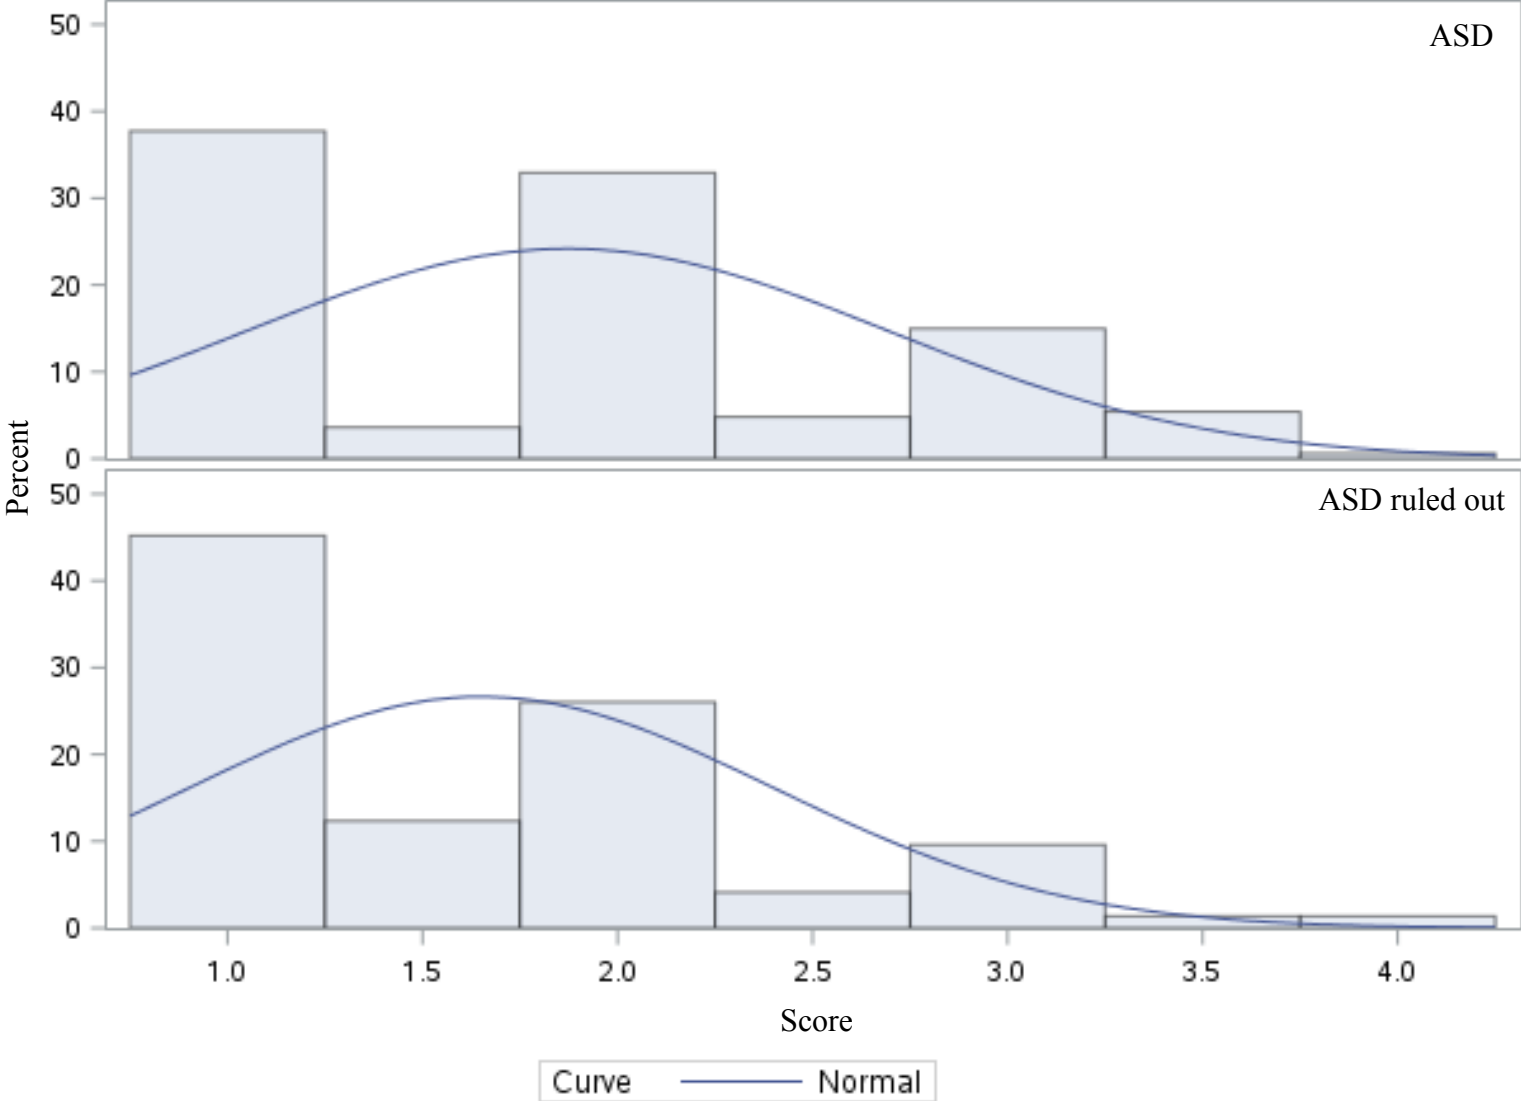

CARS-2 Item 11 ( $p < 0.001$ )

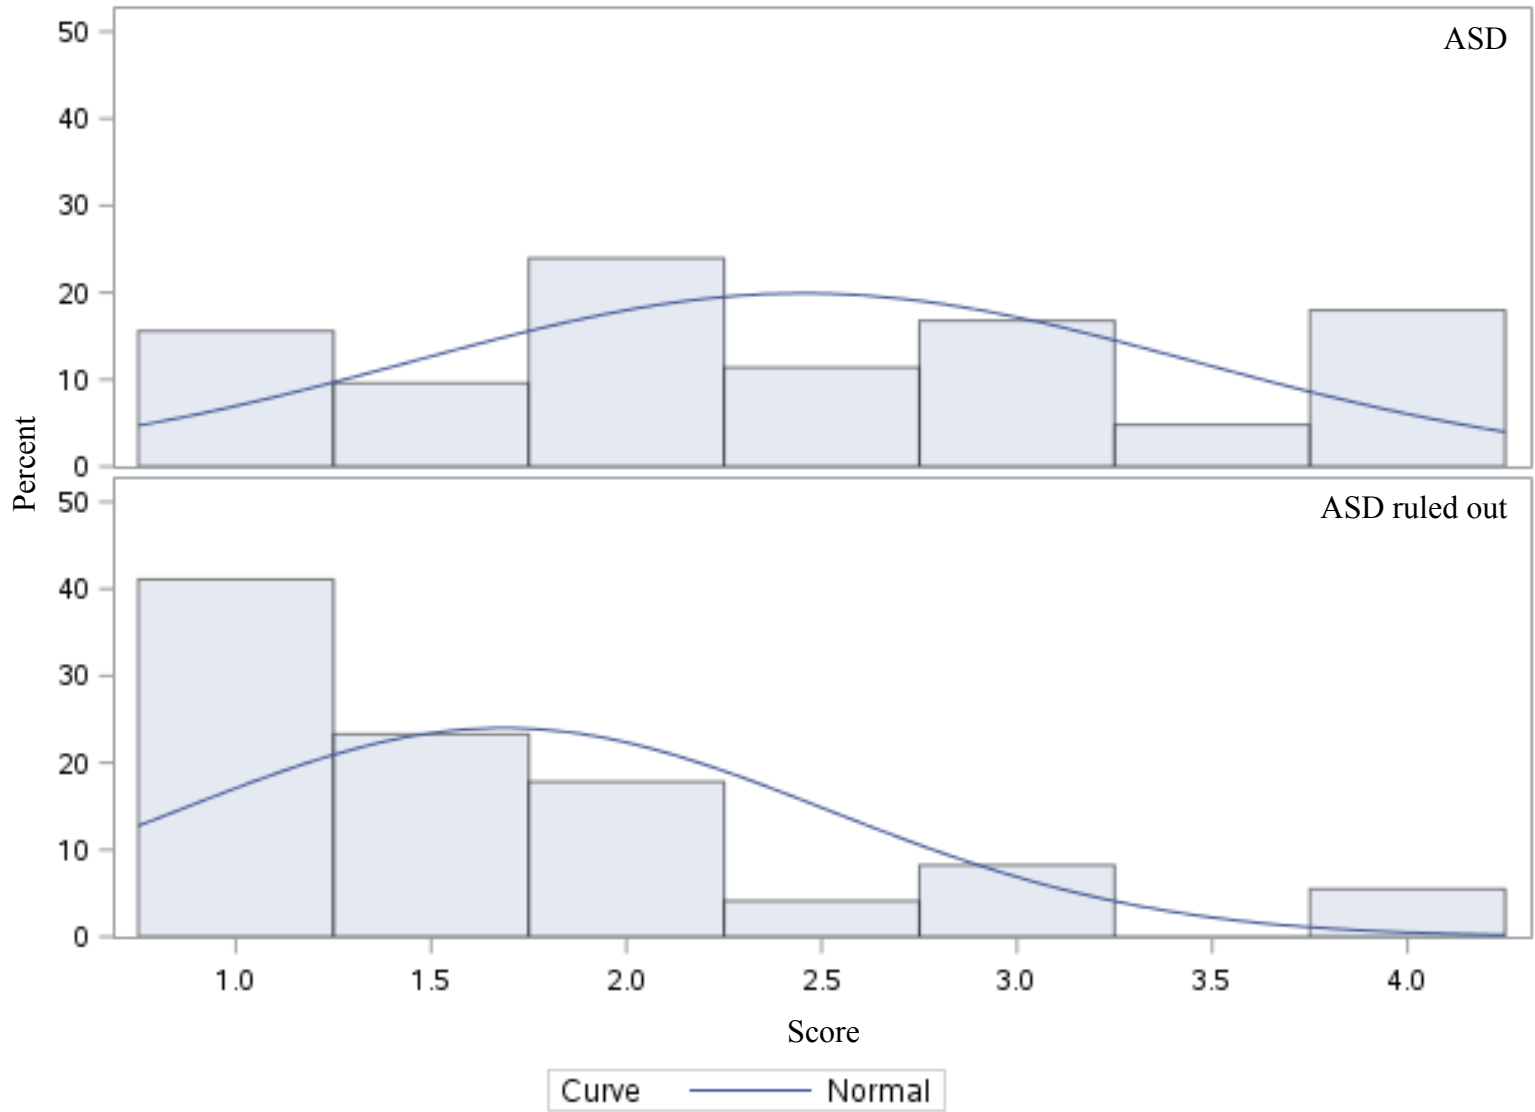

CARS-2 Item 12 ( $p < 0.001$ )

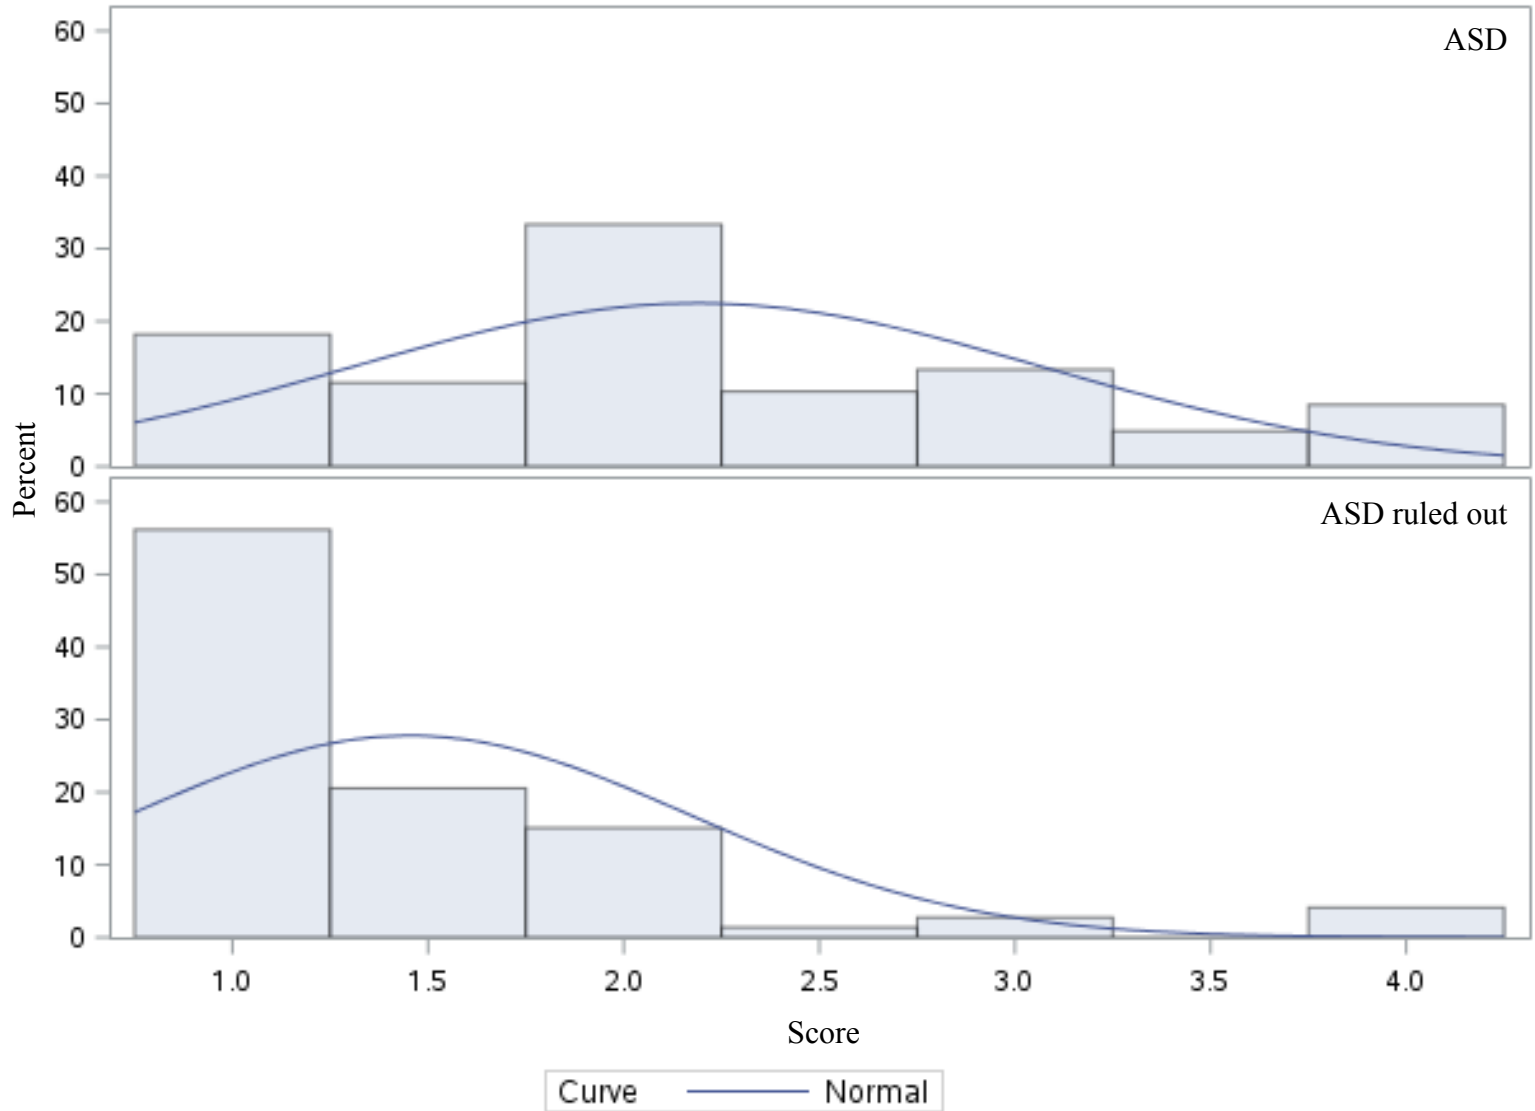

CARS-2 Item 13HF (p<0.001)

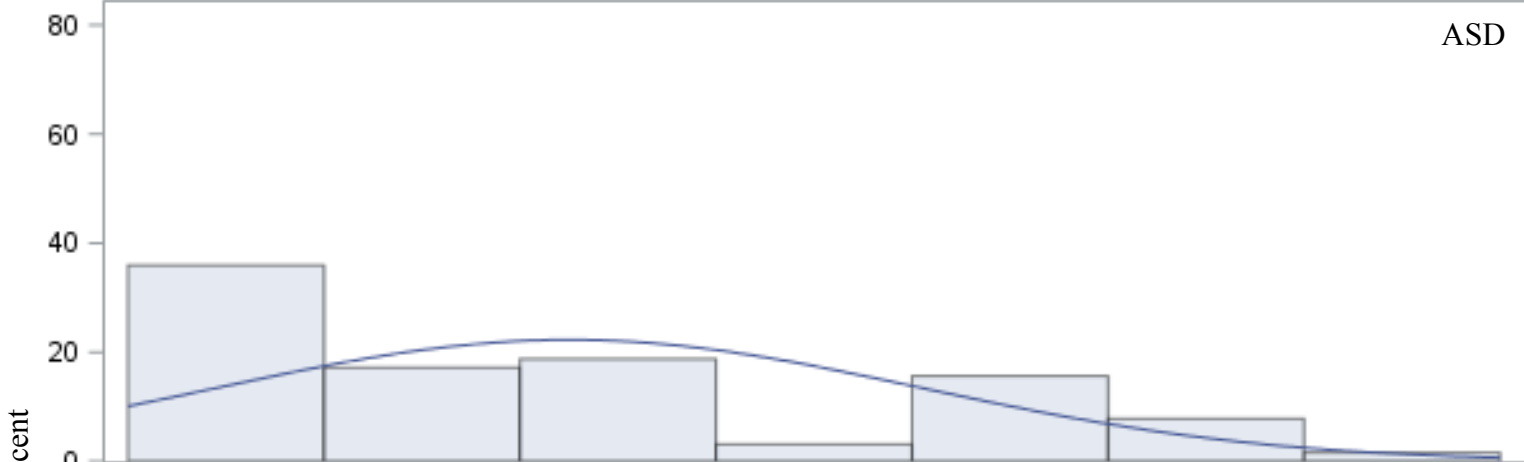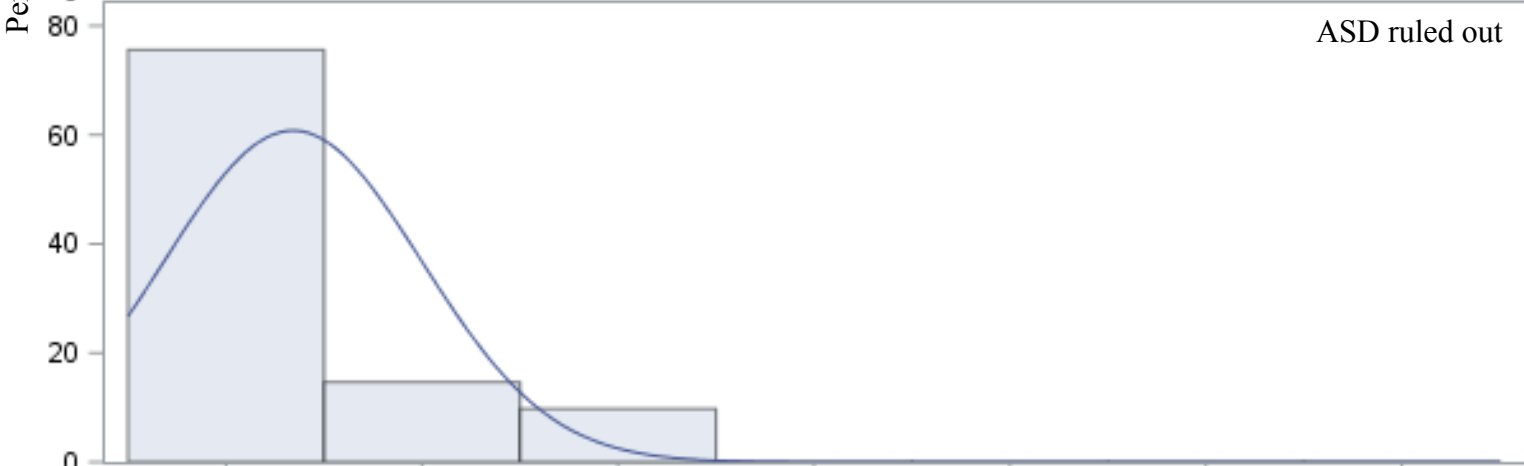

Curve — Normal

CARS-2 Item 13ST (p=0.1123)

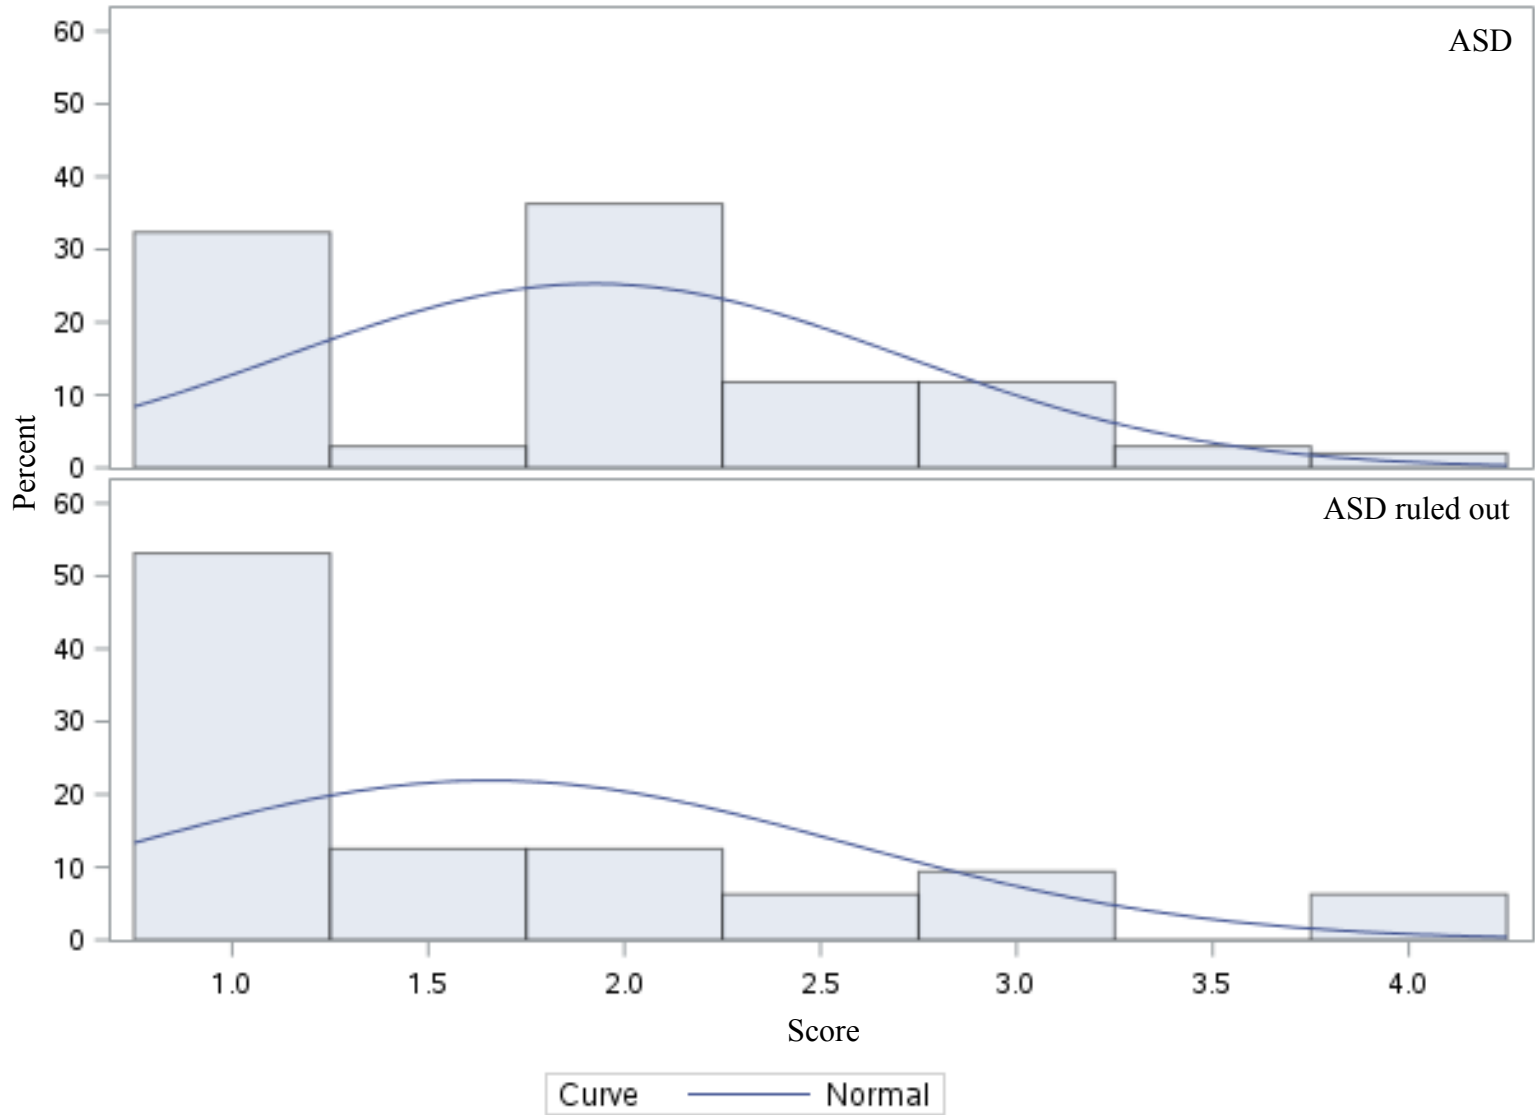

CARS-2 Item 14 ( $p < 0.001$ )

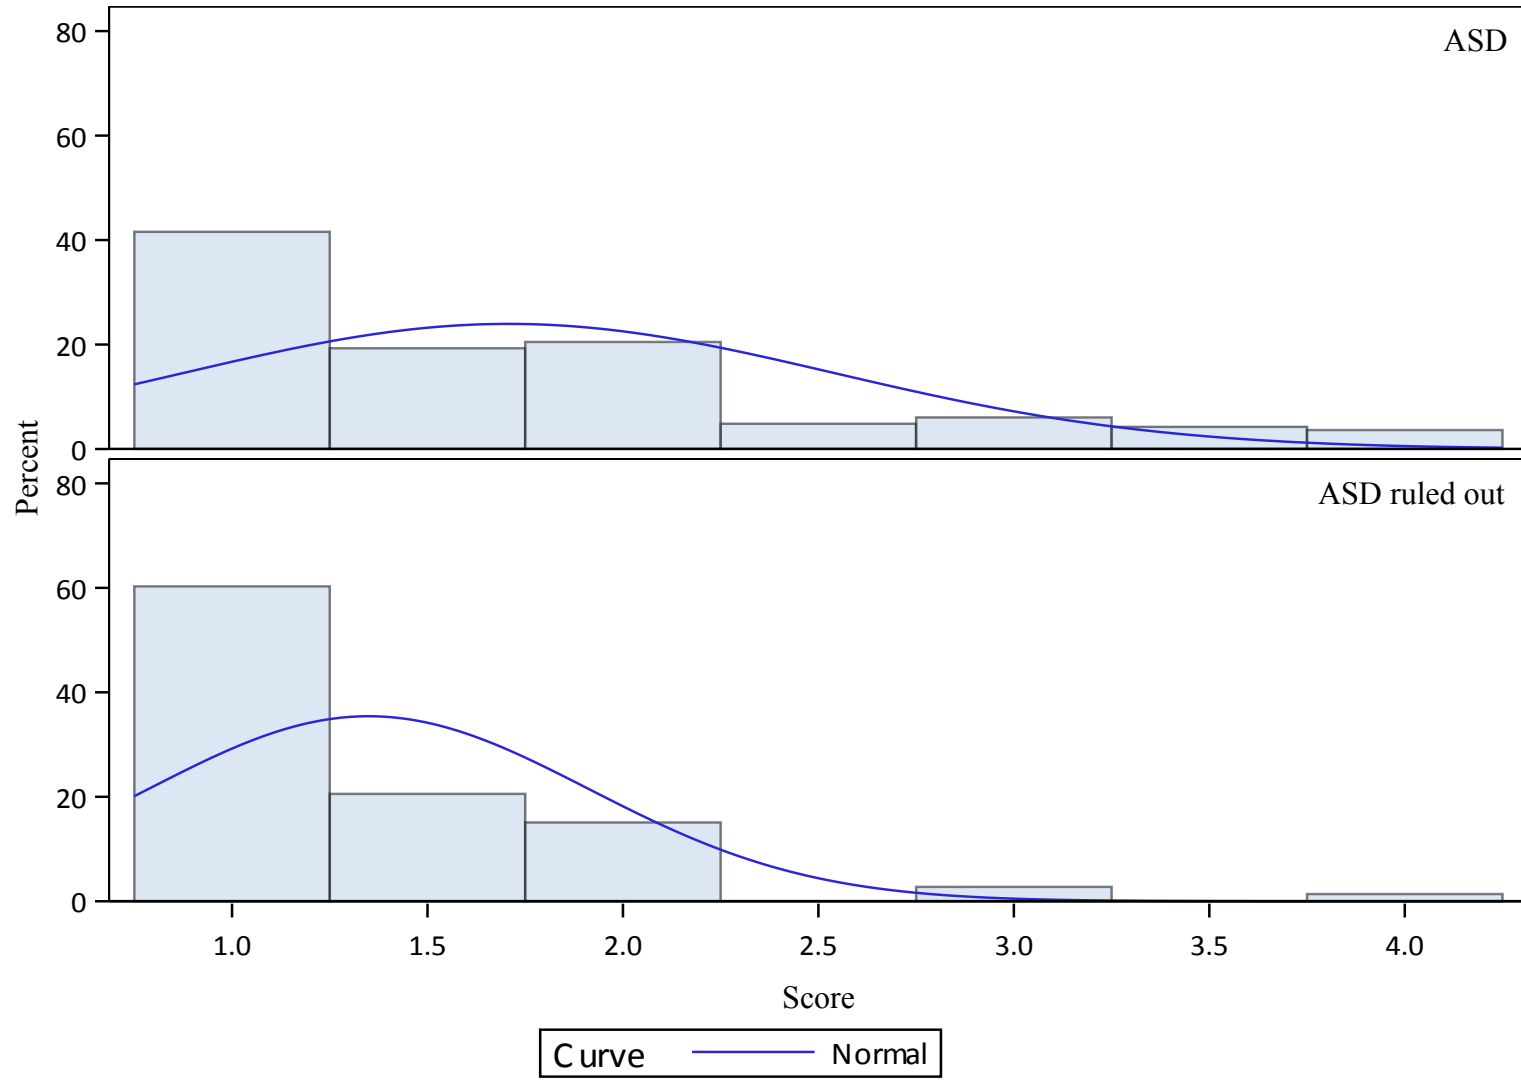

Supplement: DMCN-62-806-s002.pdf [file DMCN-62-806-s002.pdf]
